# Supplementary material for: Effect of advanced glycation end products on nocturia or sleep disorders: A longitudinal study
Source: PubMed Central journal article supplement (PMC8988819; doi:10.1002/bco2.114), 2021-10-05

Fig.S1

**A**

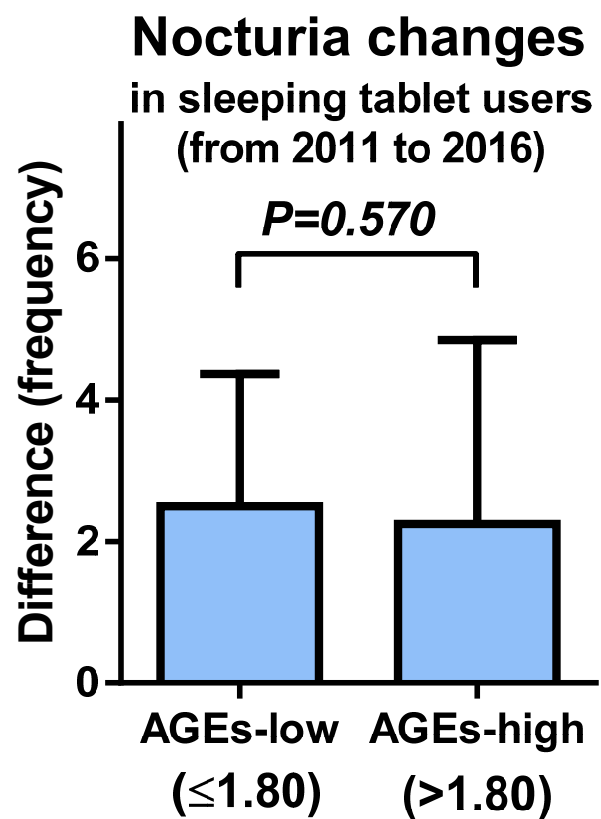

**B**

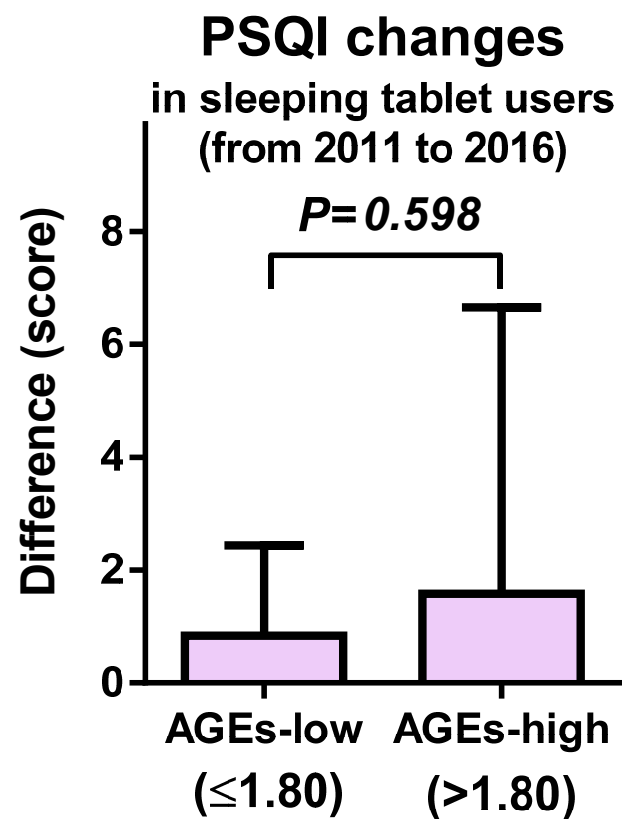

Supplement: BCO2-3-162-s001.pdf [file BCO2-3-162-s001.pdf]
